# Supplementary material for: A Mobile, Electronic Health Record-Connected Application for Managing Team Workflows in Inpatient Care
Source: PubMed Central journal article supplement — Appl Clin Inform. 2021 Dec 22;12(5):1120–34. doi: 10.1055/s-0041-1740256 (PMC8695057; doi:10.1055/s-0041-1740256), 2021-12-22
Supplement: 10-1055-s-0041-1740256-s210119ra.pdf [file 10-1055-s-0041-1740256-s210119ra.pdf]

## Supplementary Appendices

**Supplementary Appendix S1** Table of Carealign data sources

| Data type                                                                                                  | Data source                                                                  | Request type                                                   | Response time   |
|------------------------------------------------------------------------------------------------------------|------------------------------------------------------------------------------|----------------------------------------------------------------|-----------------|
| Care team and contacts                                                                                     |                                                                              |                                                                |                 |
| Inpatient treatment team                                                                                   | Epic (via homegrown portal)                                                  | Scheduled API request                                          | Near real-time  |
| Primary care provider                                                                                      | Epic Clarity Database                                                        | Direct query                                                   | Within 24 hours |
| Provider contact information                                                                               | Epic                                                                         | Scheduled API request                                          | Near real-time  |
| Health system phonebook                                                                                    | Direct query                                                                 | Real-time                                                      |                 |
| Vitals                                                                                                     |                                                                              |                                                                |                 |
| Vital signs from flowsheets                                                                                | Epic                                                                         | HL7 transactions                                               | Real-time       |
| Intake and output                                                                                          | Epic                                                                         | On-demand API                                                  | Real-time       |
| Labs and pathology                                                                                         |                                                                              |                                                                |                 |
| General laboratory results, microbiology results, anatomic pathology reports                               | Cerner                                                                       | HL7 transactions                                               | Real-time       |
| Studies                                                                                                    |                                                                              |                                                                |                 |
| Cardiology                                                                                                 |                                                                              |                                                                |                 |
| ECGs                                                                                                       | Muse                                                                         | HL7 transactions                                               | Real-time       |
| All other results (i.e., echocardiograms, vascular studies, catheterization reports, EP procedure reports) | Epic (2018–present)                                                          | HL7 transactions                                               | Real-time       |
|                                                                                                            | ProSolv (2009–2018)<br>Siemens Syngo (2013–2018)<br>Encapture MD (2011–2018) | <i>No longer in use but reports are available in Carealign</i> |                 |
| Dermatopathology                                                                                           |                                                                              |                                                                |                 |
| Biopsy results                                                                                             | New Path (Department of Dermatology)                                         | Direct query                                                   | Real-time       |
| Gastroenterology                                                                                           |                                                                              |                                                                |                 |
| Endoscopy reports                                                                                          | ProVation (2017–present)                                                     | HL7 transactions                                               | Real-time       |
|                                                                                                            | Olympus Endoworks (2006–2017)                                                | <i>No longer in use but reports are available in Carealign</i> |                 |
| Neurology                                                                                                  |                                                                              |                                                                |                 |
| EEGs, neurovascular studies                                                                                | Department of Neurology (via homegrown portal)                               | Direct query                                                   | Real-time       |
| EMGs                                                                                                       | Epic, Epic Clarity                                                           | Direct query                                                   | Within 24 hours |
| Obstetrics and gynecology                                                                                  |                                                                              |                                                                |                 |
| Ultrasounds                                                                                                | A/S                                                                          | HL7 transactions                                               | Real-time       |
| Pulmonology                                                                                                |                                                                              |                                                                |                 |
| Pulmonary function tests                                                                                   | MedGraphics Breeze                                                           | HL7 transactions                                               | Real-time       |
| Radiology                                                                                                  |                                                                              |                                                                |                 |
| Imaging reports                                                                                            | Epic Radiant                                                                 | On-demand API                                                  | Real-time       |
| Diet                                                                                                       |                                                                              |                                                                |                 |
| Diet orders                                                                                                | Epic                                                                         | HL7 transactions                                               | Real-time       |
| Allergies                                                                                                  |                                                                              |                                                                |                 |
| Allergies                                                                                                  | Epic                                                                         | HL7 transactions                                               | Real-time       |

(Continued)

**Supplementary Appendix S1** (Continued)

| Data type                                           | Data source                 | Request type          | Response time   |
|-----------------------------------------------------|-----------------------------|-----------------------|-----------------|
| Medications                                         |                             |                       |                 |
| Inpatient medications and MAR                       | Epic                        | HL7 transactions      | Real-time       |
| Home medications                                    | Epic                        | On-demand API         | Real-time       |
| Encounters and documentation                        |                             |                       |                 |
| Encounters                                          | Epic                        | HL7 transactions      | Real-time       |
| Notes and documents                                 |                             |                       |                 |
| Progress notes                                      | Epic                        | On-demand API         | Real-time       |
| ED notes                                            | Epic ASAP                   | On-demand API         | Real-time       |
| Telephone encounters                                | Epic Clarity                | Direct query          | Within 24 hours |
| Other Data                                          |                             |                       |                 |
| Patient demographics, assigned and current location | Epic                        | HL7 transactions      | Real-time       |
| Code status                                         | Epic                        | Scheduled API request | Near real-time  |
| Infection flag                                      | Epic                        | Scheduled API request | Near real-time  |
| Patient room phone number                           | Application stored database | Direct query          | Static          |

Abbreviations: API, application-program interface; ECG, electrocardiogram; ED, emergency department; EEG, electroencephalogram; EMG, electromyogram; EP, electrophysiology; HL7, Health-Level 7; MAR, medication administration record; PCP, primary care provider.  
 Note: When the Carelign initiative began and through implementation in 2016, our health system was using EpicCare (Epic Systems Corporation, Verona, Wisconsin, United States) for ambulatory care, Sunrise (Allscripts Healthcare Solutions Inc., Chicago, Illinois, United States) for inpatient care, Cerner (Cerner Corporation, Kansas City, Missouri, United States) for the laboratory information, and over 10 additional specialized systems to support Penn Medicine’s clinical data needs. One year after Carelign’s implementation, Penn Medicine transitioned its inpatient and emergency care EHR solutions to the EpicCare platform (October 2016–March 2017). Carelign’s data sources were transitioned accordingly.

**Supplementary Appendix S2** 2016 and 2018 User Survey questions

| September 2016 User Survey |                                                                                                                                                                                                                                                                                                                                                                                                                       |
|----------------------------|-----------------------------------------------------------------------------------------------------------------------------------------------------------------------------------------------------------------------------------------------------------------------------------------------------------------------------------------------------------------------------------------------------------------------|
| 1.                         | What is your patient care role?                                                                                                                                                                                                                                                                                                                                                                                       |
|                            | RN—Clinical<br>RN—Nurse manager/charge<br>RN—Student<br>APP<br>MD—Attending<br>MD—Fellow<br>MD—PGY1 resident<br>MD—PGY2 resident<br>MD—PGY3 resident<br>MD—PGY4 resident<br>MD—PGY5+ resident<br>MS—Clerkship<br>MS—Elective/sub-intern<br>Physical therapist<br>Occupational therapist<br>Pharmacist<br>SW/CRC<br>Clinical nutritionist<br>Respiratory therapist<br>Speech and swallow<br>Dietary associate<br>Other |
| 2.                         | Select your training program:                                                                                                                                                                                                                                                                                                                                                                                         |
|                            | Medicine<br>Surgery<br>OB/GYN<br>Neurology<br>Psychiatry<br>Radiology<br>Family medicine<br>Home care<br>Multiple specialties<br>Other                                                                                                                                                                                                                                                                                |
| 3.                         | Please select your main area of practice:                                                                                                                                                                                                                                                                                                                                                                             |
|                            | Medicine<br>Surgery<br>OB/GYN<br>Neurology<br>Psychiatry<br>Radiology<br>Family medicine<br>Home care<br>Multiple specialties<br>Other                                                                                                                                                                                                                                                                                |
| 4.                         | Do you use Carelign?                                                                                                                                                                                                                                                                                                                                                                                                  |
|                            | Yes<br>No                                                                                                                                                                                                                                                                                                                                                                                                             |
| 5.                         | How long have you been using Carelign?                                                                                                                                                                                                                                                                                                                                                                                |
|                            | 12 or more months<br>7–12 months<br>0–6 months                                                                                                                                                                                                                                                                                                                                                                        |
| 6.                         | In what settings have you used Carelign? (Select all that apply)                                                                                                                                                                                                                                                                                                                                                      |
|                            | Medical floor<br>Medical ICU<br>Surgical floor                                                                                                                                                                                                                                                                                                                                                                        |

(Continued)

**Supplementary Appendix S2** (Continued)

|     |                                                                                                                                                                                                           |
|-----|-----------------------------------------------------------------------------------------------------------------------------------------------------------------------------------------------------------|
|     | Surgical ICU<br>ED, short stay units<br>Procedural areas<br>Ambulatory<br>Home care<br>L&D<br>Diagnostics<br>Other                                                                                        |
| 7.  | Do you use Carelign for handoff/signouts?                                                                                                                                                                 |
|     | Yes<br>No<br>Unsure                                                                                                                                                                                       |
| 8.  | How long have you been using Carelign for handoffs/signouts?                                                                                                                                              |
|     | 12 or more months<br>7–12 months<br>0–6 months                                                                                                                                                            |
| 9.  | When do you use Carelign? (Select all that apply)                                                                                                                                                         |
|     | During transitions in care (handoff, signout, shift report, etc.)<br>While prerounding<br>During rounds<br>While writing notes<br>While talking to patients<br>While on call<br>While off campus<br>Other |
| 10. | Do you use Carelign at the patient bedside? (Select all that apply)                                                                                                                                       |
|     | Yes, to review data in response to patient questions<br>Yes, to review data not prompted by patient questions<br>Yes, to view the handoff/signout<br>Yes, to update the handoff/signout<br>No             |
| 11. | When using Carelign at the patient bedside, do you show/share what you are looking at with the patient (either verbally or visually)?                                                                     |
|     | Always<br>Often<br>Sometimes<br>Seldom<br>Never                                                                                                                                                           |
| 12. | Do you feel comfortable using Carelign?                                                                                                                                                                   |
|     | Yes<br>No                                                                                                                                                                                                 |
| 13. | On a scale of 1 to 5, how comfortable do you feel using Carelign?                                                                                                                                         |
|     | 1—Not very comfortable; I struggle to use it<br>2<br>3—Generally comfortable; I can get my work done<br>4<br>5—Very comfortable; I am proficient and can teach others                                     |
| 14. | How long did it take you to initially learn to use Carelign well enough to get your work done?                                                                                                            |

(Continued)

**Supplementary Appendix S2** (Continued)

|     |                                                                                                                                                                                                                                                                                                                                                                        |
|-----|------------------------------------------------------------------------------------------------------------------------------------------------------------------------------------------------------------------------------------------------------------------------------------------------------------------------------------------------------------------------|
|     | <1 day<br>2-3 days<br>1 week<br>>1 weeks                                                                                                                                                                                                                                                                                                                               |
| 15. | How long did it take you to reach your current level of comfort using Carelign?                                                                                                                                                                                                                                                                                        |
|     | <2 weeks<br>2-4 weeks<br>1-3 months<br>>3 months                                                                                                                                                                                                                                                                                                                       |
| 16. | Rate your level of agreement with the following statements:<br>1 (Strongly disagree); 2-3 (neither agree nor disagree); 4-5 (strongly agree)<br>"Carelign...                                                                                                                                                                                                           |
|     | ...enables me to make more timely clinical decisions<br>...improves communication between health care providers<br>...improves communication between providers and patients<br>...enables safer transitions in care<br>...improves the quality of my documentation<br>...improves my understanding of the patient plan<br>...has improved the quality of my work life" |
| 17. | Does Carelign enable you to do things/tasks that you were unable to do previously?                                                                                                                                                                                                                                                                                     |
|     | No<br>Unsure<br>Yes, please describe (free text option)                                                                                                                                                                                                                                                                                                                |

**Supplementary Appendix S2** (Continued)

|                               |                                                                                           |
|-------------------------------|-------------------------------------------------------------------------------------------|
| 18.                           | On a scale from 0-10, how likely are you to recommend Carelign to a friend or colleague?  |
| 19.                           | What do you like the most about Carelign? (Free text)                                     |
| 20.                           | What is one thing you would change about Carelign? (Free text)                            |
| 21.                           | In what way could Carelign be improved to better fit your clinical workflows? (Free text) |
| 22.                           | Additional questions, comments, or concerns for the Carelign team? (Free text)            |
| <i>April 2018 User Survey</i> |                                                                                           |
| 1.                            | Would it take more time for you to do your job without Carelign?                          |
|                               | Yes<br>No<br>Unsure                                                                       |
| 2.                            | Do you feel using Carelign has helped you prevent a medical error?                        |
|                               | Yes<br>No<br>Unsure                                                                       |
| 3.                            | If you left Penn Medicine, would you want to take Carelign with you?                      |
|                               | Yes<br>No<br>Unsure                                                                       |

Abbreviations: ICU, intensive care unit; ED, emergency department; GYN, gynecology; OB, obstetrics.
